# Supplementary material
Source: MDPI journal article supplement (https://www.mdpi.com/2673-933X/1/2/6)
Supplement: s1 [file s1]

**Table S1.** Correlation coefficients of residuals of growth of lambs from birth to early lactation (Birth to L29), early lactation to weaning (L29 to L79), birth to weaning (Birth to L79) and udder height (UH) with udder height (UH), volume (UV), circumference (UC), live weight (Ewe LW), depth of the mammary parenchyma (PAR), gland cistern (GC), and the total depth of the mammary gland generous (MTg) and conservative (MTc) of two-year-old ewes in late-pregnancy (P119), early lactation (L29) and at weaning (L79).

| Descriptor | Birth to L29 | L29 to L79 | Birth to L79 |
|------------|--------------|------------|--------------|
| UH         |              |            |              |
| L29        | -0.031       | -0.011     | -0.023       |
| L79        | -0.122       | -0.062     | -0.123       |
| UC         |              |            |              |
| P119       | -0.119       | -0.118     | -0.168       |
| L29        | 0.200        | -0.107     | 0.021        |
| UV         |              |            |              |
| L29        | 0.094        | -0.093     | -0.023       |
| L79        | 0.008        | 0.112      | 0.110        |
| Ewe LW     |              |            |              |
| P119       | -0.115       | -0.023     | -0.073       |
| L29        | 0.220        | 0.046      | 0.159        |
| L79        | -0.093       | -0.041     | -0.072       |
| GC         |              |            |              |
| P119       | -0.028       | -0.155     | -0.152       |
| L29        | 0.106        | 0.090      | 0.112        |
| L79        | 0.171        | -0.089     | 0.012        |
| PAR        |              |            |              |
| P119       | 0.038        | -0.001     | 0.030        |
| L29        | -0.103       | -0.103     | -0.147       |
| L79        | -0.027       | -0.139     | -0.124       |
| FP         |              |            |              |
| P119       | 0.032        | 0.038      | 0.058        |
| MTc        |              |            |              |
| P119       | 0.210        | -0.084     | 0.039        |
| L29        | 0.011        | 0.029      | 0.025        |
| L79        | -0.231       | 0.215      | 0.087        |
| MTg        |              |            |              |
| L29        | 0.193        | 0.101      | 0.196        |
